# Supplementary material for: Using Co-Expression Analysis and Stress-Based Screens to Uncover Arabidopsis Peroxisomal Proteins Involved in Drought Response
Source: PubMed Central journal article supplement (PMC4569587; doi:10.1371/journal.pone.0137762), 2015-09-14
Supplement: pone.0137762.s001.pdf [file pone.0137762.s001.pdf]

This S1 File contains the following:

Fig A

Fig B

Table A

Table B

Table C

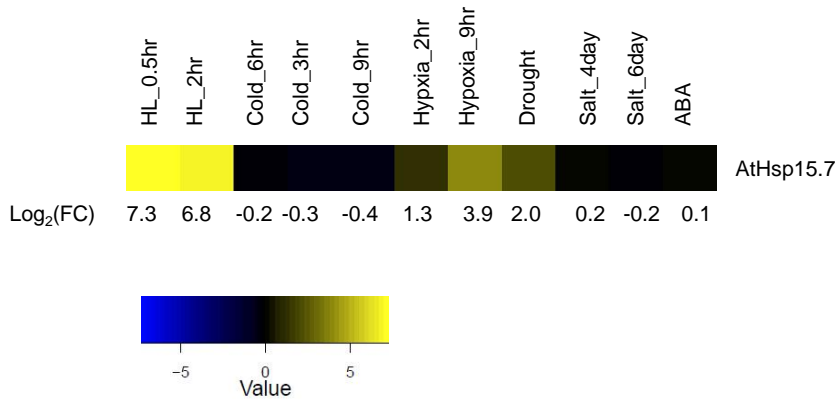

**Supplemental Fig A.** Expression of the small heat shock protein gene *AtHsp15.7* in response to abiotic stresses. FC, fold change.

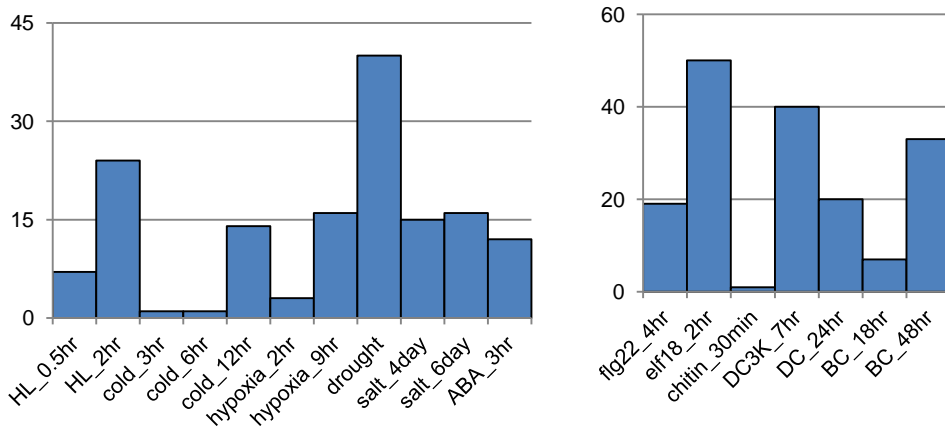

**Supplemental Fig B.** Total number of peroxisomal genes with significantly changed expression levels in response to stresses. Left, abiotic stresses. Right, biotic stresses. Genes that have log<sub>2</sub> normalized fold change >1 or <-1 are considered as significantly regulated.

**Table A. Microarray Datasets Used in This Study.**

| Abbreviation in heatmap/figure legend | Dataset series number | Experiment design and description of used dataset                                                                               | Reference or link                                                                                                                                                                                                                                       |
|---------------------------------------|-----------------------|---------------------------------------------------------------------------------------------------------------------------------|---------------------------------------------------------------------------------------------------------------------------------------------------------------------------------------------------------------------------------------------------------|
| <b><u>Developmental</u></b>           |                       |                                                                                                                                 |                                                                                                                                                                                                                                                         |
| Abbreviation in Heatmap               | Stage#                | Stage description                                                                                                               | All data for Developmental stages were downloaded from AtGenExpress:<br><a href="http://arabidopsis.org/servlets/TairObject?type=expression_set&amp;id=1006710873">http://arabidopsis.org/servlets/TairObject?type=expression_set&amp;id=1006710873</a> |
| seedling_cotyledon                    | 1                     | ATGE_1 development baseline Wt cotyledons 7 days continuous light soil                                                          |                                                                                                                                                                                                                                                         |
| seedling_hypocotyl                    | 2                     | ATGE_2 development baseline Wt hypocotyl 7 days continuous light soil                                                           |                                                                                                                                                                                                                                                         |
| seedling_leaves1+2                    | 5                     | ATGE_5 development baseline Wt leaves 1 + 2 7 days continuous light soil                                                        |                                                                                                                                                                                                                                                         |
| adult_leaves                          | 15                    | ATGE_15 development baseline Wt rosette leaf # 8 17 days continuous light soil                                                  |                                                                                                                                                                                                                                                         |
| senescing leaves                      | 25                    | ATGE_25 development baseline Wt senescing leaves 35 days continuous light soil                                                  |                                                                                                                                                                                                                                                         |
| flower                                | 39                    | ATGE_39 development baseline Wt flowers stage 15 21+ days continuous light soil                                                 |                                                                                                                                                                                                                                                         |
| siliques_stage3                       | 76                    | ATGE_76 seed & silique development Wt siliques, w/ seeds stage 3; mid globular to early heart embryos 8 wk long day (16/8) soil |                                                                                                                                                                                                                                                         |
| siliques_stage4                       | 77                    | ATGE_77 seed & silique development Wt siliques, w/ seeds stage 4; early to late heart embryos 8 wk long day (16/8) soil         |                                                                                                                                                                                                                                                         |
| siliques_stage5                       | 78                    | ATGE_78 seed & silique development Wt siliques, w/ seeds stage 5; late heart to mid torpedo embryos 8 wk long day (16/8) soil   |                                                                                                                                                                                                                                                         |
| seed_stage6                           | 79                    | ATGE_79 seed & silique development Wt seeds, stage 6, w/o siliques; mid to late torpedo embryos 8 wk long day (16/8) soil       |                                                                                                                                                                                                                                                         |

|                               |            |                                                                                                                                                                                                                                                                                                                                                                                             |                                                                                                                                                                                                                                                                      |
|-------------------------------|------------|---------------------------------------------------------------------------------------------------------------------------------------------------------------------------------------------------------------------------------------------------------------------------------------------------------------------------------------------------------------------------------------------|----------------------------------------------------------------------------------------------------------------------------------------------------------------------------------------------------------------------------------------------------------------------|
| seed_stage7                   | 81         | ATGE_81 seed & silique development Wt seeds, stage 7, w/o siliques; late torpedo to early walking-stick embryos 8 wk long day (16/8) soil                                                                                                                                                                                                                                                   |                                                                                                                                                                                                                                                                      |
| seed_stage8                   | 82         | ATGE_82 seed & silique development Wt seeds, stage 8, w/o siliques; walking-stick to early curled cotyledons embryos 8 wk long day (16/8) soil                                                                                                                                                                                                                                              |                                                                                                                                                                                                                                                                      |
| seed_stage9                   | 83         | ATGE_83 seed & silique development Wt seeds, stage 9, w/o siliques; curled cotyledons to early green cotyledon embryos 8 wk long day (16/8) soil                                                                                                                                                                                                                                            |                                                                                                                                                                                                                                                                      |
| seed_stage10                  | 84         | ATGE_84 seed & silique development Wt seeds, stage 10, w/o siliques; green cotyledons embryos 8 wk long day (16/8) soil                                                                                                                                                                                                                                                                     |                                                                                                                                                                                                                                                                      |
| <b>abiotic stress</b>         |            |                                                                                                                                                                                                                                                                                                                                                                                             |                                                                                                                                                                                                                                                                      |
| HL_0.5hr, HL_2hr              | E-MTAB-403 | Col-0 plants were grown in growth chambers for 3.5 weeks. Plant leaf tissue was incubated for at least 6 h in a LL growth chamber (light intensity was 65 $\mu\text{mol photons /m}^2\cdot\text{s}$ , 22 °C) and then collected as control sample. The leaf tissue was exposed for 0.5 hr and 2 hr to light with an intensity of 1,300 $\mu\text{mol photons /m}^2\cdot\text{s}$ , (22 °C). | Jung, H.S., Crisp, P.A., Estavillo, G.M., Cole, B., Hong, F., Mockler, T.C., Pogson, B.J., and Chory, J. (2013). Subset of heat-shock transcription factors required for the early response of Arabidopsis to excess light. Proc Natl Acad Sci USA 110, 14474-14479. |
| cold_3hr, cold_6hr, cold_24hr | GSE3326    | The wild-type seeds were plated on MS agar plates supplemented with 3% sucrose. Seedlings were grown at 22°C with 16-h-light and 8-h-dark cycles for 2 weeks before being harvested. To avoid variations due to circadian rhythm, all cold treatments were started at 12 PM at 0°C under light and continued for 0 (untreated control), 3, 6, and 24 h.                                     | Lee, B.H., Henderson, D.A., and Zhu, J.K. (2005). The Arabidopsis cold-responsive transcriptome and its regulation by ICE1. Plant Cell 17, 3155-3175.                                                                                                                |
| hypoxia_2hr, hypoxia_9hr      | GSE9719    | Seedlings grown in vertical orientation for 7–14 d on solid Murashige–Skoog medium containing 1% sucrose were treated with mixed gases in humidified chambers. Seedlings were deprived of O <sub>2</sub> as well as CO <sub>2</sub> in chambers which were purged with 99.99% Ar(gas), as control. Alternatively,                                                                           | Sorenson, R., and Bailey-Serres, J. (2014). Selective mRNA sequestration by OLIGOURIDYLATE-BINDING PROTEIN 1 contributes to translational control during hypoxia in Arabidopsis. Proc Natl Acad Sci USA 111, 2373-2378.                                              |

|                             |                 |                                                                                                                                                                                                                                                                                          |                                                                                                                                                                                                                                                                                                                                                                                       |
|-----------------------------|-----------------|------------------------------------------------------------------------------------------------------------------------------------------------------------------------------------------------------------------------------------------------------------------------------------------|---------------------------------------------------------------------------------------------------------------------------------------------------------------------------------------------------------------------------------------------------------------------------------------------------------------------------------------------------------------------------------------|
|                             |                 | treatment was with 2% O <sub>2</sub> , 370 ppm CO <sub>2</sub> , in a balance of N <sub>2</sub> for 2hr and 9hr.                                                                                                                                                                         |                                                                                                                                                                                                                                                                                                                                                                                       |
| drought                     | GSE10643        | Wild-type plants were grown under normal watering conditions for 24 days and then stressed by completely depriving of irrigation for 10 days.                                                                                                                                            | Zhang, Y., Xu, W., Li, Z., Deng, X.W., Wu, W., and Xue, Y. (2008). F-box protein DOR functions as a novel inhibitory factor for abscisic acid-induced stomatal closure under drought stress in Arabidopsis. <i>Plant Physiol</i> 148, 2121-2133.                                                                                                                                      |
| salt_4day                   | GSE53308        | Wild type Arabidopsis Col-0 plants were grown hydroponically and treated with or without 150mM NaCl and harvested after 4 days of treatment.                                                                                                                                             | Allu, A.D., Soja, A.M., Wu, A., Szymanski, J., and Balazadeh, S. (2014). Salt stress and senescence: identification of cross-talk regulatory components. <i>J Exp Bot</i> 65, 3993-4008.                                                                                                                                                                                              |
| salt_6day                   | GSE16765        | Arabidopsis Col-0 were grown in the growth chamber in the absence and presence of salt stress. Plants of 2 weeks were subject to salt treatment for 6 days and were used for RNA extraction.                                                                                             | Chan, Z., Grumet, R., and Loescher, W. (2011). Global gene expression analysis of transgenic, mannitol-producing, and salt-tolerant Arabidopsis thaliana indicates widespread changes in abiotic and biotic stress-related genes. <i>J Exp Bot</i> 62, 4787-4803.                                                                                                                     |
| ABA                         | RIKEN-GODA17&21 | Wild-type seedlings were treated with ABA and mock for 3 hr.                                                                                                                                                                                                                             | Nemhauser, J.L., Hong, F., and Chory, J. (2006). Different plant hormones regulate similar processes through largely nonoverlapping transcriptional responses. <i>Cell</i> 126, 467-475.<br><a href="http://arabidopsis.org/servlets/TairObject?type=hyb_descrcollection&amp;id=1007964750">http://arabidopsis.org/servlets/TairObject?type=hyb_descrcollection&amp;id=1007964750</a> |
| <b><u>biotic stress</u></b> |                 |                                                                                                                                                                                                                                                                                          |                                                                                                                                                                                                                                                                                                                                                                                       |
| flg22_4hr                   | GSE11807        | Six-week old Col-0 plants were infiltrated with 1 μM flg22 or ddH <sub>2</sub> O and harvested 4 hours later. Total RNA was extracted, biotinlabeled and hybridized to the Affymetrix ATH1 chip. Gene expression values from treated sample were compared to that of mock-treated sample | Bethke G, Unthan T, Uhrig JF, Poschl Y, Gust AA, et al. (2009) Flg22 regulates the release of an ethylene response factor substrate from MAP kinase 6 in Arabidopsis thaliana via ethylene signaling. <i>Proc Natl Acad Sci USA</i> 106: 8067-8072.                                                                                                                                   |

|                        |          |                                                                                                                                                                                                                                                                                                                                                                                      |                                                                                                                                                                                                                                                                            |
|------------------------|----------|--------------------------------------------------------------------------------------------------------------------------------------------------------------------------------------------------------------------------------------------------------------------------------------------------------------------------------------------------------------------------------------|----------------------------------------------------------------------------------------------------------------------------------------------------------------------------------------------------------------------------------------------------------------------------|
| elf18_2hr              | GSE34047 | 3-week old Col-0 plants were infiltrated with 10 $\mu$ M elf18 or mock and harvested after 2 hrs. Three biological replicates were included                                                                                                                                                                                                                                          | Pajerowska-Mukhtar KM, Wang W, Tada Y, Oka N, Tucker CL, et al. (2012) The HSF-like transcription factor TBF1 is a major molecular switch for plant growth-to-defense transition. <i>Curr Biol</i> 22: 103-112.                                                            |
| chitin_30min           | GSE28227 | 2-week old MS medium-grown seedlings were treated with chitooctase at a final concentration of 1 $\mu$ M for 30 minutes. The controls were similarly treated with an equivalent amount of ddH <sub>2</sub> O. Seedlings were harvested for RNA isolation. Three biological replicates were conducted for the experiment                                                              | <a href="http://www.ncbi.nlm.nih.gov/geo/query/acc.cgi?acc=GSE28227">http://www.ncbi.nlm.nih.gov/geo/query/acc.cgi?acc=GSE28227</a>                                                                                                                                        |
| DC3K_7hr;<br>DC3K_24hr | GSE5520  | 4-week old Arabidopsis leaves were treated with bacterial pathogen <i>Pseudomonas syringae</i> pv. Tomato DC3000. The first leaf sample was treated with bacteria at the concentration of 10 <sup>8</sup> bacteria/ml and sampled 7 hours later, and the second leaf sample was treated with bacteria at the concentration of 10 <sup>6</sup> bacteria/ml and sampled 24 hours later | Thilmony R, Underwood W, He SY (2006) Genome-wide transcriptional analysis of the Arabidopsis thaliana interaction with the plant pathogen <i>Pseudomonas syringae</i> pv. tomato DC3000 and the human pathogen <i>Escherichia coli</i> O157:H7. <i>Plant J</i> 46: 34-53. |
| BC_18hr; BC_48hr       | GSE5684  | Adult Col-0 leaves were inoculated by placing 4 5- $\mu$ l drops of 5x10 <sup>5</sup> <i>Botrytis cinerea</i> spore solution. Control leaves were spotted with droplets of 24g/L potato dextrose broth medium. Samples were collected at 18 hrs and 48 hrs after inoculation.                                                                                                        | <a href="http://www.ncbi.nlm.nih.gov/geo/query/acc.cgi?acc=GSE5684">http://www.ncbi.nlm.nih.gov/geo/query/acc.cgi?acc=GSE5684</a>                                                                                                                                          |

**Table B. Arabidopsis Peroxisomal Gene List.**

160 peroxisomal genes have expression data and were used for co-expression analysis. The last eight genes do not have microarray probes.

| Order | Gene name      | A.t Locus | Microarray probe ID | Annotation                                |
|-------|----------------|-----------|---------------------|-------------------------------------------|
| 1     | <i>ACH2</i>    | AT1G01710 | 261560_at           | acyl-CoA thioesterase family protein      |
| 2     | <i>PEX11c</i>  | AT1G01820 | 261534_at           | PEX11c, peroxisome elongation             |
| 3     | <i>PEX6</i>    | AT1G03000 | 263170_at           | peroxin6                                  |
| 4     | <i>st4</i>     | AT1G04290 | 263661_at           | thioesterase family protein               |
| 5     | <i>KAT1</i>    | AT1G04710 | 264608_at           | 3-keto-acyl-CoA thiolase 1                |
| 6     | <i>ACX3</i>    | AT1G06290 | 260789_s_at         | acyl-CoA oxidase 3                        |
| 7     | <i>ACX6</i>    | AT1G06310 | 259419_at           | acyl-CoA oxidase 6                        |
| 8     | <i>ACD31.2</i> | AT1G06460 | 262629_at           | alpha-crystallin domain 31.2              |
| 9     | <i>NDA1</i>    | AT1G07180 | 256057_at           | alternative NAD(P)H dehydrogenase 1       |
| 10    | <i>GLX1</i>    | AT1G11840 | 264372_at           | glyoxalase i homolog 1                    |
| 11    | <i>GAPC2</i>   | AT1G13440 | 259361_at           | glyceraldehyde-3-phosphate dehydrogenase  |
| 12    | <i>UP6</i>     | AT1G16730 | 255763_at           | unknown protein 6                         |
| 13    | <i>DHAR</i>    | AT1G19570 | 261149_s_at         | dehydroascorbate reductase 1              |
| 14    | <i>4CI3</i>    | AT1G20480 | 259569_at           | 4-coumaroyl-CoA synthase family protein   |
| 15    | <i>OPCL1</i>   | AT1G20510 | 259518_at           | opc-8:0 -CoA ligase1                      |
| 16    | <i>AAE1</i>    | AT1G20560 | 259545_at           | acyl-activating enzyme 1                  |
| 17    | <i>CAT3</i>    | AT1G20620 | 259544_at           | catalase 3                                |
| 18    | <i>CAT1</i>    | AT1G20630 | 259517_at           | catalase 1                                |
| 19    | <i>ATF1</i>    | AT1G21770 | 262499_at           | acyl-CoA n-acyltransferases               |
| 20    | <i>GGT1</i>    | AT1G23310 | 262988_at           | alanine-2-oxoglutarate aminotransferase 1 |
| 21    | <i>DEG15</i>   | AT1G28320 | 245687_at           | endopeptidase                             |
| 22    | <i>UP9</i>     | AT1G29120 | 260889_at           | unknown protein 9                         |
| 23    | <i>PEX7</i>    | AT1G29260 | 260844_at           | peroxin 7                                 |

|    |               |           |           |                                              |
|----|---------------|-----------|-----------|----------------------------------------------|
| 24 | <i>AAE14</i>  | AT1G30520 | 261801_at | acyl-activating enzyme 14                    |
| 25 | <i>PEX11a</i> | AT1G47750 | 261739_at | PEX11a, peroxisome elongation                |
| 26 | <i>st1</i>    | AT1G48320 | 262237_at | thioesterase family protein                  |
| 27 | <i>pxPfkB</i> | AT1G49350 | 262398_at | pfkb-type carbohydrate kinase family protein |
| 28 | <i>NQR</i>    | AT1G49670 | 261601_at | involved in oxidative stress tolerance.      |
| 29 | <i>ICDH</i>   | AT1G54340 | 262962_at | isocitrate dehydrogenase                     |
| 30 | <i>NS</i>     | AT1G60550 | 264920_at | naphthoate synthase                          |
| 31 | <i>ECI</i>    | AT1G65520 | 264627_at | enoyl-CoA hydratase/isomerase family protein |
| 32 | <i>PAO4</i>   | AT1G65840 | 262933_at | polyamine oxidase 4                          |
| 33 | <i>BZO1</i>   | AT1G65880 | 261915_at | benzoate-CoA ligase                          |
| 34 | <i>AAE12</i>  | AT1G65890 | 261922_at | acyl-activating enzyme 12                    |
| 35 | <i>HPR1</i>   | AT1G68010 | 260014_at | hydroxypyruvate reductase 1                  |
| 36 | <i>GGT2</i>   | AT1G70580 | 260309_at | glutamate:glyoxylate aminotransferase 2      |
| 37 | <i>ECH2</i>   | AT1G76150 | 261771_at | monofunctional enoyl-CoA hydratase 2         |
| 38 | <i>ATF2</i>   | AT1G77540 | 259706_at | histone acetyltransferase                    |
| 39 | <i>PEX2</i>   | AT1G79810 | 261348_at | peroxin2                                     |
| 40 | <i>SMP2</i>   | AT2G02510 | 267239_at | NADH dehydrogenase                           |
| 41 | <i>OPR3</i>   | AT2G06050 | 265530_at | OPDA-reductase 3                             |
| 42 | <i>AGT1</i>   | AT2G13360 | 263350_at | alanine:glyoxylate aminotransferase          |
| 43 | <i>DRP3B</i>  | AT2G14120 | 263278_at | dynamamin-related protein 3B                 |
| 44 | <i>MDH1</i>   | AT2G22780 | 266457_at | peroxisomal NAD-malate dehydrogenase 1       |
| 45 | <i>SOX</i>    | AT2G24580 | 263788_at | sarcosine oxidase family protein             |
| 46 | <i>Uri</i>    | AT2G26230 | 267374_at | uricase/urate oxidase putative               |
| 47 | <i>PEX10</i>  | AT2G26350 | 267433_at | peroxin 10                                   |
| 48 | <i>CoAE</i>   | AT2G27490 | 265637_at | dephospho-CoA kinase                         |
| 49 | <i>st5</i>    | AT2G29590 | 266298_at | thioesterase family protein                  |
| 50 | <i>NDA2</i>   | AT2G29990 | 266835_at | alternative NAD(P)H dehydrogenase 2          |



|    |                        |                         |             |                                                          |
|----|------------------------|-------------------------|-------------|----------------------------------------------------------|
| 51 | <i>CHYH1</i>           | AT2G30650               | 267571_at   | 3-hydroxyisobutyryl-coenzyme a hydrolase                 |
| 52 | <i>CHYH2</i>           | AT2G30660               | 267572_at   | 3-hydroxyisobutyryl-coenzyme a hydrolase                 |
| 53 | <i>UP3</i>             | AT2G31670               | 263449_at   | unknown protein 3                                        |
| 54 | <i>KAT2</i>            | AT2G33150               | 245168_at   | 3-keto-acyl-CoA thiolase 2                               |
| 55 | <i>ACX5</i>            | AT2G35690               | 265843_at   | acyl-CoA oxidase 5                                       |
| 56 | <i>GLH</i>             | AT2G38180               | 267096_at   | gdsl-motif lipase/hydrolase family protein               |
| 57 | <i>PXN/PMP38/PMP36</i> | AT2G39970               | 267363_at   | peroxisomal membrane protein 36                          |
| 58 | <i>PM16</i>            | AT2G41790               | 260554_at   | peptidase m16 family protein                             |
| 59 | <i>CuAO</i>            | AT2G42490               | 265882_at   | copper amine oxidase                                     |
| 60 | <i>CSY3</i>            | AT2G42790               | 263986_at   | citrate synthase 3                                       |
| 61 | <i>PAO2</i>            | AT2G43020               | 265244_at   | polyamine oxidase 2                                      |
| 62 | <i>PEN2</i>            | AT2G44490               | 267392_at   | o-glycosyl compounds hydrolase                           |
| 63 | <i>PEX16</i>           | AT2G45690               | 267512_at   | peroxin 6                                                |
| 64 | <i>PEX11d</i>          | AT2G45740               | 266925_at   | PEX11d, peroxisome elongation                            |
| 65 | <i>SO</i>              | AT3G01910               | 258948_at   | sulfite oxidase                                          |
| 66 | <i>SDRc</i>            | AT3G01980               | 258976_at   | short-chain dehydrogenase/reductase (sdr) family protein |
| 67 | <i>6PGDH</i>           | AT3G02360               | 256328_at   | 6-phosphogluconate dehydrogenase family protein          |
| 68 | <i>PEX19A</i>          | AT3G03490               | 259052_at   | peroxin 19-1                                             |
| 69 | <i>PEX12</i>           | AT3G04460               | 258627_at   | peroxin 22                                               |
| 70 | <i>PNC1</i>            | AT3G05290               | 259306_at   | peroxisomal adenine nucleotide carrier 1                 |
| 71 | <i>LACS6</i>           | AT3G05970               | 258563_at   | long-chain acyl-CoA synthetase 6                         |
| 72 | <i>IBR3</i>            | AT3G06810               | 258525_at   | acyl-CoA dehydrogenase                                   |
| 73 | <i>MFP2</i>            | AT3G06860               | 258555_at   | multifunctional protein 2                                |
| 74 | <i>CML3</i>            | AT3G07490               | 259064_at   | calcium ion binding                                      |
| 75 | <i>PEX13</i>           | AT3G07560               | 259068_at   | peroxin 13                                               |
| 76 | <i>SDRb</i>            | AT3G12800               | 257687_at   | short-chain dehydrogenase                                |
| 77 | <i>HAOX1/2</i>         | AT3G14130,<br>AT3G14150 | 257004_s_at | putative glycolate oxidase                               |

|     |               |                         |             |                                                           |
|-----|---------------|-------------------------|-------------|-----------------------------------------------------------|
| 78  | <i>GOX1/2</i> | AT3G14415,<br>AT3G14420 | 258359_s_at | glycolate oxidase                                         |
| 79  | <i>HBCDH</i>  | AT3G15290               | 257052_at   | 3-hydroxybutyryl-CoA dehydrogenase, putative              |
| 80  | <i>AAE7</i>   | AT3G16910               | 257880_at   | acyl-activating enzyme 7                                  |
| 81  | <i>GPK1</i>   | AT3G17420               | 257295_at   | glyoxysomal protein kinase 1                              |
| 82  | <i>PEX3A</i>  | AT3G18160               | 258150_at   | peroxin 3a                                                |
| 83  | <i>SCO3</i>   | AT3G19570               | 257047_at   | snowy cotyledon3                                          |
| 84  | <i>DRP5B</i>  | AT3G19720               | 257045_at   | dynamamin-related protein 5B                              |
| 85  | <i>ICL</i>    | AT3G21720               | 257947_at   | isocitrate lyase                                          |
| 86  | <i>PEX22</i>  | AT3G21865               | 257953_at   | peroxin 22                                                |
| 87  | <i>GR1</i>    | AT3G24170               | 257252_at   | glutathione-disulfide reductase 1                         |
| 88  | <i>MDAR4</i>  | AT3G27820               | 257227_at   | monodehydroascorbate reductase 4                          |
| 89  | <i>PEX11b</i> | AT3G47430               | 252411_at   | PEX11b, peroxisome elongation                             |
| 90  | <i>B12D1</i>  | AT3G48140               | 252348_at   | senescence-associated protein                             |
| 91  | <i>BADH</i>   | AT3G48170               | 252354_at   | betaine aldehyde dehydrogenase                            |
| 92  | <i>MIF</i>    | AT3G51660               | 252076_at   | macrophage migration inhibitory factor family protein     |
| 93  | <i>ACX4</i>   | AT3G51840               | 246304_at   | acyl-CoA oxidase 4                                        |
| 94  | <i>MDAR1</i>  | AT3G52880               | 252024_at   | monodehydroascorbate reductase                            |
| 95  | <i>SDRd</i>   | AT3G55290               | 251780_s_at | short-chain dehydrogenase/reductase (sdr) family protein] |
| 96  | <i>CDC</i>    | AT3G55640               | 251757_at   | mitochondrial substrate carrier family protein            |
| 97  | <i>ZnDH</i>   | AT3G56460               | 251687_at   | zinc-binding dehydrogenase                                |
| 98  | <i>HIT3</i>   | AT3G56490               | 251707_at   | histidine triad family protein                            |
| 99  | <i>FIS1A</i>  | AT3G57090               | 251659_at   | fission protein 1A                                        |
| 100 | <i>CP</i>     | AT3G57810               | 251558_at   | OTU-like cysteine protease                                |
| 101 | <i>CSY1</i>   | AT3G58740               | 251540_at   | citrate synthase 1                                        |
| 102 | <i>CSY2</i>   | AT3G58750               | 251541_at   | citrate synthase 2                                        |
| 103 | <i>PMD1</i>   | AT3G58840               | 251556_at   | peroxisome and mitochondria division protein              |
| 104 | <i>PAO3</i>   | AT3G59050               | 251505_at   | polyamine oxidase 3                                       |

|     |                 |           |           |                                                        |
|-----|-----------------|-----------|-----------|--------------------------------------------------------|
| 105 | <i>PEX11e</i>   | AT3G61070 | 251352_at | PEX11e, peroxisome elongation                          |
| 106 | <i>st3</i>      | AT3G61200 | 251307_at | thioesterase family protein                            |
| 107 | <i>ACH</i>      | AT4G00520 | 255679_at | acyl-CoA thioesterase family protein                   |
| 108 | <i>EH3</i>      | AT4G02340 | 255525_at | putative epoxide hydrolase                             |
| 109 | <i>MCD</i>      | AT4G04320 | 255327_at | malonyl-CoA decarboxylase family protein               |
| 110 | <i>PMP22</i>    | AT4G04470 | 255338_at | peroxisomal membrane protein 22                        |
| 111 | <i>4CL1</i>     | AT4G05160 | 255263_at | putative 4-coumaroyl-CoA synthase                      |
| 112 | <i>IBR1</i>     | AT4G05530 | 255240_at | short-chain dehydrogenase                              |
| 113 | <i>NDPK1</i>    | AT4G09320 | 255089_at | nucleoside diphosphate kinase 1                        |
| 114 | <i>SCPL20</i>   | AT4G12910 | 254791_at | serine carboxypeptidase-like 20                        |
| 115 | <i>IBR10</i>    | AT4G14430 | 245359_at | enoyl-CoA hydratase/isomerase family protein           |
| 116 | <i>ECHIA</i>    | AT4G16210 | 245484_at | enoyl-CoA hydratase/isomerase family protein           |
| 117 | <i>HIT1</i>     | AT4G16566 | 245337_at | histidine triad family protein                         |
| 118 | <i>ACX1</i>     | AT4G16760 | 245249_at | acyl-CoA oxidase 1                                     |
| 119 | <i>GOX3</i>     | AT4G18360 | 254630_at | putative glycolate oxidase                             |
| 120 | <i>4CI5</i>     | AT4G19010 | 254600_at | 4-coumaroyl-coa synthase family protein                |
| 121 | <i>NDB1</i>     | AT4G28220 | 253810_at | NAD(P)H dehydrogenase b                                |
| 122 | <i>AIM1</i>     | AT4G29010 | 253759_at | abnormal inflorescence meristem1 , enoyl-CoA hydratase |
| 123 | <i>DRP3A</i>    | AT4G33650 | 253306_at | dynamamin-related protein 3A                           |
| 124 | <i>APX3</i>     | AT4G35000 | 253223_at | ascorbate peroxidase 3                                 |
| 125 | <i>CAT2</i>     | AT4G35090 | 253174_at | catalase 2                                             |
| 126 | <i>RDL1</i>     | AT4G36880 | 246250_at | cysteine-type peptidase                                |
| 127 | <i>AGT2</i>     | AT4G39660 | 252855_at | alanine:glyoxylate aminotransferase 2                  |
| 128 | <i>PXA1/CTS</i> | AT4G39850 | 252830_at | peroxisomal ABC transporter 1                          |
| 129 | <i>MLS</i>      | AT5G03860 | 250868_at | malate synthase                                        |
| 130 | <i>BIOTIN_F</i> | AT5G04620 | 250837_at | 7-keto-8-aminopelargonic acid synthase                 |
| 131 | <i>CPK1</i>     | AT5G04870 | 246955_at | calcium-dependent protein kinase isoform               |

|     |                  |           |             |                                                                 |
|-----|------------------|-----------|-------------|-----------------------------------------------------------------|
| 132 | <i>PEX1</i>      | AT5G08470 | 250520_at   | peroxin 1, ATPase                                               |
| 133 | <i>MDH2</i>      | AT5G09660 | 250498_at   | peroxisomal NAD-malate dehydrogenase 2                          |
| 134 | <i>ASP3</i>      | AT5G11520 | 250385_at   | aspartate aminotransferase 3                                    |
| 135 | <i>ELT1</i>      | AT5G11910 | 250299_at   | esterase/lipase/thioesterase family protein                     |
| 136 | <i>FIS1B</i>     | AT5G12390 | 245178_at   | mitochondria and peroxisome fission protein                     |
| 137 | <i>AAE5</i>      | AT5G16370 | 250114_s_at | acyl-activating enzyme 5                                        |
| 138 | <i>ATMS1</i>     | AT5G17920 | 259343_s_at | methionine synthesis 1                                          |
| 139 | <i>CSD3</i>      | AT5G18100 | 250016_at   | copper superoxide dismutase 3                                   |
| 140 | <i>NUDT19</i>    | AT5G20070 | 246126_at   | nudix hydrolase homolog 19                                      |
| 141 | <i>AAE17</i>     | AT5G23050 | 249869_at   | acyl-activating enzyme 17                                       |
| 142 | <i>6PGL</i>      | AT5G24400 | 249733_at   | 6-phosphoglucunolactonase                                       |
| 143 | <i>PEX4</i>      | AT5G25760 | 246862_at   | peroxin4, ubiquitin-protein ligase                              |
| 144 | <i>PNC2</i>      | AT5G27520 | 246779_at   | peroxisomal adenine nucleotide carrier 2                        |
| 145 | <i>LACS7</i>     | AT5G27600 | 246789_at   | long-chain acyl-CoA synthetase 7                                |
| 146 | <i>AtHsp15.7</i> | AT5G37670 | 249575_at   | 15.7 kda class i-related small heat shock protein-like          |
| 147 | <i>GSTT1</i>     | AT5G41210 | 249291_at   | glutathione s-transferase (class theta) 1                       |
| 148 | <i>SCP2</i>      | AT5G42890 | 249178_at   | sterol carrier protein 2                                        |
| 149 | <i>AtDCI</i>     | AT5G43280 | 249145_at   | delta(3,5),delta(2,4)-dienoyl-CoA isomerase 1                   |
| 150 | <i>UP5</i>       | AT5G44250 | 249064_at   | unknown protein 5                                               |
| 151 | <i>LON2</i>      | AT5G47040 | 248818_at   | lon protease homolog 2                                          |
| 152 | <i>ACAT1.3</i>   | AT5G47720 | 248779_at   | putative acetyl-CoA c-acyltransferase                           |
| 153 | <i>ACAT2</i>     | AT5G48230 | 248690_at   | acetoacetyl-CoA thiolase 2                                      |
| 154 | <i>KAT5</i>      | AT5G48880 | 248625_at   | 3-keto-acyl-CoA thiolase 5                                      |
| 155 | <i>PEX5</i>      | AT5G56290 | 248010_at   | peroxin 5, peroxisome matrix targeting signal-1 binding protein |
| 156 | <i>TLP</i>       | AT5G58220 | 247858_at   | transthyretin-like protein                                      |
| 157 | <i>PEX14</i>     | AT5G62810 | 247422_at   | peroxin 14                                                      |
| 158 | <i>4CL2</i>      | AT5G63380 | 247380_at   | 4-coumarate-CoA ligase family protein                           |

|     |               |           |           |                                                              |
|-----|---------------|-----------|-----------|--------------------------------------------------------------|
| 159 | <i>ACX2</i>   | AT5G65110 | 247176_at | acyl-CoA oxidase 2                                           |
| 160 | <i>CHY1</i>   | AT5G65940 | 247117_at | beta-hydroxyisobutyryl-CoA hydrolase 1                       |
| 161 | <i>AAE18</i>  | AT1G48635 | no probe  | acyl-activating enzyme 18                                    |
| 162 | <i>PEX3B</i>  | AT1G50510 | no probe  | peroxin 3B                                                   |
| 163 | <i>IndA</i>   | AT1G55320 | no probe  | indigoidine synthase a family protein                        |
| 164 | <i>NADK3</i>  | AT1G78590 | no probe  | NADH kinase                                                  |
| 165 | <i>APEM9</i>  | AT3G10572 | no probe  | required for both pts1- and pts2-dependent protein transport |
| 166 | <i>PEX19B</i> | AT5G17550 | no probe  | peroxin 19B                                                  |
| 167 | <i>MIA40</i>  | AT5G23395 | no probe  | mitochondrial intermembrane space assembly machinery 40      |
| 168 | <i>HIT2</i>   | AT5G48545 | no probe  | histidine triad nucleotide-binding 3                         |

**Table C. Mutants Used in the Primary Screen for Drought Tolerance.**

KO, knock-out; KD, knock-down.

| <b>Mutant</b>    | <b>SALK_ID</b> | <b>Gene expression</b> | <b>Transcriptional regulation by drought, log<sub>2</sub>(FC)</b> | <b>Reference</b> |
|------------------|----------------|------------------------|-------------------------------------------------------------------|------------------|
| <i>aba1</i>      | SALK_059469    | KO                     | Control                                                           | [1]              |
| <i>hpr1-1</i>    | SALK_067724    | KO                     | limited up-regulation, 0.44                                       | [2]              |
| <i>hpr1-2</i>    | SALK_143584    | KO                     |                                                                   |                  |
| <i>cat2</i>      | SALK_076998    | KO                     | up-regulated by drought, 1.70                                     | [3]              |
| <i>gox1</i>      | SAIL_177_G11   | KO                     | limited up-regulation by drought, 0.42                            | [4]              |
| <i>gox3</i>      | SALK_020909    | KO                     | up-regulated by drought, 1.10                                     | [5]              |
| <i>hsp15.7-1</i> | SALK_038951    | KD                     | up-regulated by drought, 2.05                                     | [6]              |
| <i>hsp15.7-2</i> | SALK_107711    | KO                     |                                                                   |                  |
| <i>pao2-1</i>    | SALK_046281    | KO                     | down-regulated by drought, -1.37                                  | [7]              |
| <i>pao2-2</i>    | SALK_062035    |                        |                                                                   |                  |
| <i>pxn-1</i>     | SALK_038951    | KO                     | limited up-regulation by drought, 0.03                            | [8]              |
| <i>pxn-2</i>     | SALK_107711    | KD                     |                                                                   |                  |
| <i>csy3</i>      | SALK_076319    | KO                     | up-regulated by drought, 2.23                                     |                  |
| <i>mif</i>       | SALK_037373    |                        | up-regulated by drought, 1.79                                     |                  |
| <i>lon2-2</i>    | SALK_043857    | KO                     | up-regulated by ABA/drought, 1.98/0.51                            | [9]              |
| <i>kat5-1</i>    | SALK_132871    |                        | down-regulated by drought, -1.93                                  | [10]             |
| <i>kat5-2</i>    | SALK_144464    | KD                     |                                                                   |                  |
| <i>acx3-1</i>    | SALK_128947    |                        | limited up-regulation by drought, 0.05                            | [11]             |
| <i>acx3-2</i>    | SALK_044956    | KO                     |                                                                   |                  |
| <i>acx4-1</i>    | SALK_000879    | KO                     | up-regulated by drought, 1.21                                     | [11]             |
| <i>acx4-2</i>    | SALK_065013    | KO                     |                                                                   |                  |
| <i>acx6</i>      | SALK_023093    | KO                     | limited up-regulation by drought, 0.01                            | [11]             |

|               |                         |    |                                        |      |
|---------------|-------------------------|----|----------------------------------------|------|
| <i>acx1/5</i> | SALK_041464/SALK_009998 | KO | up-regulated by drought, 1.38/0.51     | [12] |
| <i>aae14</i>  | SALK_038308             |    | down-regulated by drought, -2.27       |      |
| <i>chy1-1</i> | SALK_025417             | KO | limited up-regulation by drought, 0.82 | [13] |
| <i>chy1-2</i> | SALK_102725             |    |                                        |      |

## References

- Riboni M, Galbiati M, Tonelli C, Conti L (2013) GIGANTEA enables drought escape response via abscisic acid-dependent activation of the florigens and SUPPRESSOR OF OVEREXPRESSION OF CONSTANS. *Plant Physiol* 162: 1706-1719.
- Timm S, Nunes-Nesi A, Parnik T, Morgenthal K, Wienkoop S, et al. (2008) A cytosolic pathway for the conversion of hydroxypyruvate to glycerate during photorespiration in Arabidopsis. *Plant Cell* 20: 2848-2859.
- Shibata M, Oikawa K, Yoshimoto K, Kondo M, Mano S, et al. (2013) Highly oxidized peroxisomes are selectively degraded via autophagy in Arabidopsis. *Plant Cell* 25: 4967-4983.
- Rojas CM, Senthil-Kumar M, Wang K, Ryu CM, Kaundal A, et al. (2012) Glycolate oxidase modulates reactive oxygen species-mediated signal transduction during nonhost resistance in *Nicotiana benthamiana* and Arabidopsis. *Plant Cell* 24: 336-352.
- Quan S, Yang P, Cassin-Ross G, Kaur N, Switzenberg R, et al. (2013) Proteome analysis of peroxisomes from etiolated Arabidopsis seedlings identifies a peroxisomal protease involved in beta-oxidation and development. *Plant Physiol* 163: 1518-1538.
- Ma C (2005) Subcellular and functional analyses of two small heat shock proteins and protein kinases from peroxisomes of Arabidopsis thaliana L. PhD Dissertatoin.
- Kim DW, Watanabe K, Murayama C, Izawa S, Niitsu M, et al. (2014) Polyamine Oxidase5 Regulates Arabidopsis Growth through Thermospermine Oxidase Activity. *Plant Physiol* 165: 1575-1590.
- Bernhardt K, Wilkinson S, Weber AP, Linka N (2012) A peroxisomal carrier delivers NAD(+) and contributes to optimal fatty acid degradation during storage oil mobilization. *Plant J* 69: 1-13.
- Lingard MJ, Bartel B (2009) Arabidopsis LON2 is necessary for peroxisomal function and sustained matrix protein import. *Plant Physiol* 151: 1354-1365.
- Wiszniewski A (2011) Dissecting functions of members of  $\beta$ -oxidation multi-gene families in Arabidopsis. PhD Dissertatoin.
- Adham AR, Zolman BK, Millius A, Bartel B (2005) Mutations in Arabidopsis acyl-CoA oxidase genes reveal distinct and overlapping roles in beta-oxidation. *Plant J* 41: 859-874.
- Schillmiller AL, Koo AJ, Howe GA (2007) Functional diversification of acyl-coenzyme A oxidases in jasmonic acid biosynthesis and action. *Plant Physiol* 143: 812-824.

13. Ibdah M, Pichersky E (2009) Arabidopsis Chy1 null mutants are deficient in benzoic acid-containing glucosinolates in the seeds. *Plant Biol (Stuttg)* 11: 574-581.
